# Supplementary material for: β-Bi2O3 reduction by laser irradiation in a liquid environment
Source: Royal Society of Chemistry journal article supplement (doi:10.1039/c8cp00146d), 2018-01-01
Supplement: c8cp00146d1.pdf [file c8cp00146d1.pdf]

**Supplementary Information**  
 **$\beta$ -Bi<sub>2</sub>O<sub>3</sub> reduction by laser irradiation in liquid environment**

**D. D'Angelo, S. Filice, M. Miritello, C. Bongiorno, E. Fazio, F. Neri, G. Compagnini and S. Scalese\***

**Table S1.** Content (%) of Bi<sup>0</sup>, Bi<sup>2+</sup> and Bi<sup>3+</sup> in initial and laser irradiated samples, calculated by peak deconvolution reported in Fig.S1.

| SAMPLE  | %Bi <sup>0</sup> | %Bi <sup>2+</sup> | %Bi <sup>3+</sup> |
|---------|------------------|-------------------|-------------------|
| BOET    |                  | 18.7              | 81.3              |
| BOET35  | 4.7              | 95.3              |                   |
| BOET70  | 15.3             | 84.7              |                   |
| BOET140 | 33.1             | 66.9              |                   |

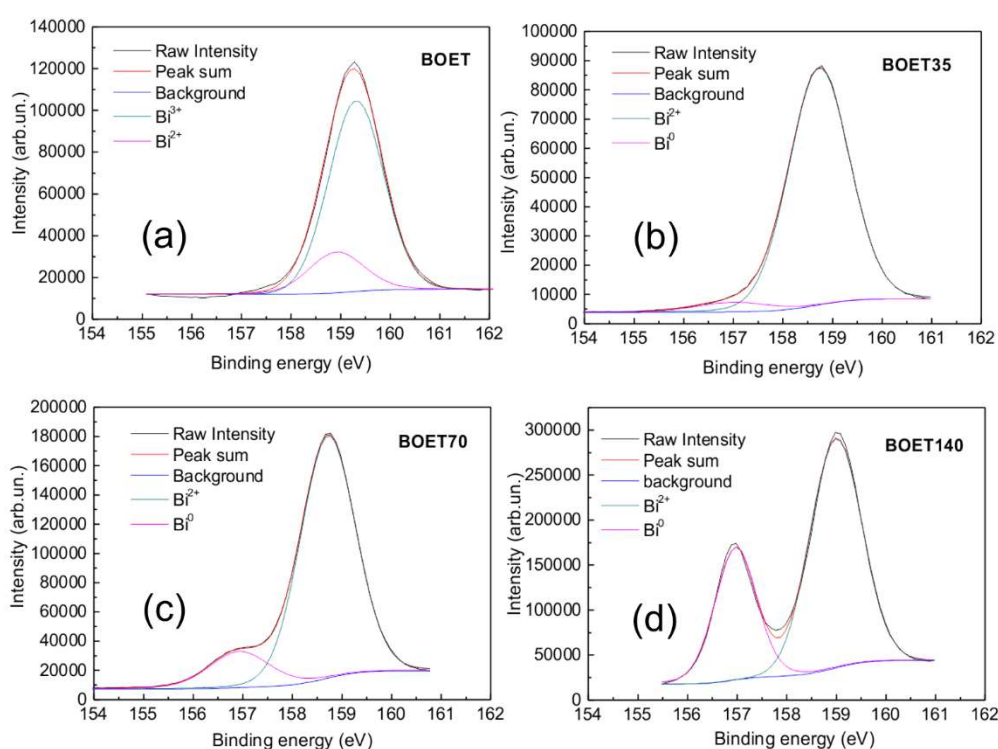

**Fig.S1** Deconvolution of Bi<sub>4f<sub>7/2</sub></sub> XPS spectra of BOET (a), BOET35 (b), BOET70 (c) and BOET140 (d) reporting the metal Bi and the Bi oxide components, respectively. The Bi<sub>4f<sub>7/2</sub></sub> binding energies for Bi<sup>0</sup> and Bi<sup>3+</sup> were fixed at 157.0 eV and 159.3 eV, respectively, while contributions due to sub-oxides were found at 158.8 eV. In the case of BOET140 the sub-oxide peak is upshifted to 159 eV due to the presence of C=O contamination, as confirmed by the C1s spectrum (see Fig.5c)
